# Supplementary material
Source: MDPI journal article supplement (https://www.mdpi.com/2073-4395/13/9/2221)
Supplement: s1 [file s1]

## Supplementary Material

RNAi-mediated interference with *EonuGR1* affects the recognition of phenylethylaldehyde by *Empoasca onukii* Matsuda (Hemiptera: Cicadellidae)

Ruirui Zhang<sup>2</sup>, Xiaoyue Lun<sup>2</sup>, Yunhe Zhao<sup>2</sup>, Yu Zhang<sup>2</sup>, Yan Cao<sup>2</sup>, Xiangzhi Zhang<sup>2</sup>, Meina Jin<sup>2</sup>, Zhengqun Zhang<sup>2\*</sup> and Xiuxiu Xu<sup>1\*</sup>

\*Correspondence: Zhengqun Zhang<sup>2\*</sup>, zqzhang@sdau.edu.cn; Xiuxiu Xu<sup>1\*</sup>, yuayu88-66@163.com

**Table. S1** Amino acid composition of EonuGR1 protein

| Amino acid | Number/Percentage (%) |
|------------|-----------------------|
| Ala (A)    | 5.4                   |
| Arg (R)    | 5.4                   |
| Asn (N)    | 2.0                   |
| Asp (D)    | 3.7                   |
| Cys (C)    | 1.4                   |
| Gln (Q)    | 3.1                   |
| Glu (E)    | 3.1                   |
| Gly (G)    | 3.4                   |
| His (H)    | 2.8                   |
| Ile (I)    | 9.6                   |
| Leu (L)    | 11.9                  |
| Lys (K)    | 4.0                   |
| Met (M)    | 2.5                   |
| Phe (F)    | 6.2                   |
| Pro (P)    | 3.4                   |
| Ser (S)    | 8.8                   |
| Thr (T)    | 5.7                   |
| Trp (W)    | 2.8                   |
| Tyr (Y)    | 3.4                   |
| Val (V)    | 11.3                  |
